# Supplementary material for: Brazilin cream from Caesalpinia sappan inhibit periodontal disease: in vivo study
Source: PeerJ. 2024 Jul 5;12:e17642. doi: 10.7717/peerj.17642 (PMC11229682; doi:10.7717/peerj.17642)
Supplement: Supplemental Information 1 [file peerj-12-17642-s001.xlsx]

## Sheet: Sheet1
	Sample	Angiogenesis score				Average	STD	RSD
		1	2	3	4					Note :
	I	1	2	1	3	1.75	0.957427	0		I	: Negative control (normal rat)
	II	0	0	0	1	0.25	0.5	200		II	: Positive control (bacterial induction rat)
	III	0	0	0	0	0	0	0		III	: Vehicle control (1 x oral base cream)
	IV	1	1	1	1	1	0	0		IV	: Drug control (1 x patent medicine)
	V	1	2	1	1	1.25	0.5	40		V	: II + 1 x brazilin cream
	VI	1	1	1	1	1	0	0		VI	: II + 2 x brazilin cream
