# Supplementary material for: Brazilin cream from Caesalpinia sappan inhibit periodontal disease: in vivo study
Source: PeerJ. 2024 Jul 5;12:e17642. doi: 10.7717/peerj.17642 (PMC11229682; doi:10.7717/peerj.17642)
Supplement: Supplemental Information 2 [file peerj-12-17642-s002.xlsx]

## Sheet: Sheet1
	Sample	IL-6 Gene expression				Average	SD	RSD		Note :
		1	2	3	4					I	: Negative control (normal rat)
	I	0.962594	1.12896	0.976032	0.942785	1.00259	0.0853467	8.51259		II	: Positive control (bacterial induction rat)
	II	19.7667	25.5455	23.5067	23.0229	22.9605	2.3934	10.424		III	: Vehicle control (1 x oral base cream)
	III	21.9325	19.0934	22.5491	25.5455	22.2801	2.64648	11.8782		IV	: Drug control (1 x patent medicine)
	IV	8.54452	8.31087	7.13543	8.60396	8.14869	0.687254	8.43391		V	: II + 1 x brazilin cream
	V	4.3319	4.21344	4.12673	3.85038	4.13061	0.204877	4.95998		VI	: II + 2 x brazilin cream
	VI	4.36203	3.64268	3.71922	3.82378	3.88693	0.325317	8.36952
