# Supplementary material for: Brazilin cream from Caesalpinia sappan inhibit periodontal disease: in vivo study
Source: PeerJ. 2024 Jul 5;12:e17642. doi: 10.7717/peerj.17642 (PMC11229682; doi:10.7717/peerj.17642)
Supplement: Supplemental Information 3 [file peerj-12-17642-s003.xlsx]

## Sheet: Sheet1
	Sample	p-38 Gene expression				Average	SD	RSD		Note :
		1	2	3	4					I	: Negative control (normal rat)
	I	1.04608	1.05336	0.929805	0.982821	1.00302	0.0581873	5.80122		II	: Positive control (bacterial induction rat)
	II	16.971	15.8345	16.3929	14.0744	15.8182	1.25172	7.91316		III	: Vehicle control (1 x oral base cream)
	III	16.6217	15.7251	16.0555	14.7741	15.7941	0.774268	4.90225		IV	: Drug control (1 x patent medicine)
	IV	9.67995	8.72406	6.34227	10.3031	8.76234	1.73916	19.8481		V	: II + 1 x brazilin cream
	V	7.54228	8.31087	7.18506	7.64756	7.67144	0.469998	6.12659		VI	: II + 2 x brazilin cream
	VI	5.22344	5.91755	5.71598	5.75573	5.65318	0.29946	5.29721
