# Supplementary material for: Brazilin cream from Caesalpinia sappan inhibit periodontal disease: in vivo study
Source: PeerJ. 2024 Jul 5;12:e17642. doi: 10.7717/peerj.17642 (PMC11229682; doi:10.7717/peerj.17642)
Supplement: Supplemental Information 4 [file peerj-12-17642-s004.xlsx]

## Sheet: Sheet1
	Sample	NF-κB protein expression				Average	STD	RSD		Note :
		1	2	3	4					I	: Negative control (normal rat)
	I	11.824	6.197	3.524	4.017	6.3905	3.80398	0		II	: Positive control (bacterial induction rat)
	II	59.035	58.479	53.833	70.61	60.4892	7.13889	11.8019		III	: Vehicle control (1 x oral base cream)
	III	40.376	42.799	47.664	41.84	43.1698	3.15748	0		IV	: Drug control (1 x patent medicine)
	IV	16.534	18.55	16.876	23.813	18.9433	3.36388	17.7577		V	: II + 1 x brazilin cream
	V	36.792	34.797	35.864	35.565	35.7545	0.824846	2.30697		VI	: II + 2 x brazilin cream
	VI	21.058	25.327	35.787	26.637	27.2022	6.19908	22.7889
