# Supplementary material for: Brazilin cream from Caesalpinia sappan inhibit periodontal disease: in vivo study
Source: PeerJ. 2024 Jul 5;12:e17642. doi: 10.7717/peerj.17642 (PMC11229682; doi:10.7717/peerj.17642)
Supplement: Supplemental Information 5 [file peerj-12-17642-s005.xlsx]

## Sheet: Sheet1
	Sample	IL-1B Gene expression				Average	SD	RSD		Note :
		1	2	3	4					I	: Negative control (normal rat)
	I	0.912249	1.08485	0.912249	1.10765	1.00425	0.10664	10.6189		II	: Positive control (bacterial induction rat)
	II	22.1618	24.761	20.393	19.9733	21.8223	2.17664	9.97439		III	: Vehicle control (1 x oral base cream)
	III	23.4254	22.0087	20.5348	19.1597	21.2821	1.84253	8.65762		IV	: Drug control (1 x patent medicine)
	IV	11.7942	8.11168	8.63383	11.0043	9.886	1.78959	18.1023		V	: II + 1 x brazilin cream
	V	10.5195	8.96933	9.54669	11.432	10.1169	1.08529	10.7275		VI	: II + 2 x brazilin cream
	VI	5.18736	4.21344	4.27226	6.25496	4.98201	0.958645	19.2421
