# Supplementary material for: Brazilin cream from Caesalpinia sappan inhibit periodontal disease: in vivo study
Source: PeerJ. 2024 Jul 5;12:e17642. doi: 10.7717/peerj.17642 (PMC11229682; doi:10.7717/peerj.17642)
Supplement: Supplemental Information 6 [file peerj-12-17642-s006.xlsx]

## Sheet: Sheet1
	Sample	TNF-a gene expression				Average	SD	RSD		Note :
		1	2	3	4					I	: Negative control (normal rat)
	I	1.02456	0.949342	1.01748	1.02456	1.00398	0.0365803	3.64351		II	: Positive control (bacterial induction rat)
	II	19.6302	23.3443	16.2797	18.3156	19.3924	2.97337	15.3326		III	: Vehicle control (1 x oral base cream)
	III	19.9042	20.4638	19.9042	21.3328	20.4012	0.674734	3.30732		IV	: Drug control (1 x patent medicine)
	IV	8.96933	7.75432	6.16884	8.25347	7.78649	1.18813	15.2589		V	: II + 1 x brazilin cream
	V	8.4855	8.96933	8.90737	8.42689	8.69727	0.280542	3.22563		VI	: II + 2 x brazilin cream
	VI	5.87667	4.21344	5.25977	4.5789	4.9822	0.737285	14.7984
