# Supplementary material for: Brazilin cream from Caesalpinia sappan inhibit periodontal disease: in vivo study
Source: PeerJ. 2024 Jul 5;12:e17642. doi: 10.7717/peerj.17642 (PMC11229682; doi:10.7717/peerj.17642)
Supplement: Supplemental Information 7 [file peerj-12-17642-s007.xlsx]

## Sheet: Sheet1
	Sample	Inflammation score				Average	STD	RSD
		1	2	3	4					Note :
	I	0	0	0	0	0	0	0		I	: Negative control (normal rat)
	II	2	3	2	3	2.5	0.57735	23.094		II	: Positive control (bacterial induction rat)
	III	2	2	3	3	2.5	0.57735	23.094		III	: Vehicle control (1 x oral base cream)
	IV	0	0	1	1	0.5	0.57735	115.47		IV	: Drug control (1 x patent medicine)
	V	1	1	2	1	1.25	0.5	40		V	: II + 1 x brazilin cream
	VI	1	2	1	1	1.25	0.5	40		VI	: II + 2 x brazilin cream
