# Supplementary material for: Brazilin cream from Caesalpinia sappan inhibit periodontal disease: in vivo study
Source: PeerJ. 2024 Jul 5;12:e17642. doi: 10.7717/peerj.17642 (PMC11229682; doi:10.7717/peerj.17642)
Supplement: Supplemental Information 8 [file peerj-12-17642-s008.xlsx]

## Sheet: Sheet1
	Sample	Collagen value				Average	STD	RSD		Note :
		1	2	3	4					I	: Negative control (normal rat)
	I	52.194	49.666	44.388	50.326	49.1435	2.89791	0		II	: Positive control (bacterial induction rat)
	II	38.758	33.597	37.493	31.365	35.3033	2.96443	8.39705		III	: Vehicle control (1 x oral base cream)
	III	34.907	36.438	33.185	38.968	35.8745	2.12466	0		IV	: Drug control (1 x patent medicine)
	IV	50.94	52.877	40.239	40.954	46.2525	5.70291	12.33		V	: II + 1 x brazilin cream
	V	44.962	35.966	38.131	44.939	40.9995	4.02447	9.8159		VI	: II + 2 x brazilin cream
	VI	44.962	35.966	38.131	49.63	42.1722	5.43714	12.8927
