# Supplementary material for: Brazilin cream from Caesalpinia sappan inhibit periodontal disease: in vivo study
Source: PeerJ. 2024 Jul 5;12:e17642. doi: 10.7717/peerj.17642 (PMC11229682; doi:10.7717/peerj.17642)
Supplement: Supplemental Information 10 [file peerj-12-17642-s010.xls]

## Sheet: Sheet1
ITEM TO CHECK	IMPORTANCE	CHECKLIST
EXPERIMENTAL DESIGN
Definition of experimental and control groups	E	149
Number within each group	E	149
Assay carried out by core lab or investigator's lab?	D	137
Acknowledgement of authors' contributions	D	337-340
SAMPLE
Description	E	118
Volume/mass of sample processed	D	119-134
Microdissection or macrodissection	E	166;176
Processing procedure	E	118-200
If frozen - how and how quickly?	E	193
If fixed - with what, how quickly?	E	167-190
Sample storage conditions and duration (especially for FFPE samples)	E	-
NUCLEIC ACID EXTRACTION
Procedure and/or instrumentation	E	192-200
Name of kit and details of any modifications	E	193-199
Source of additional reagents used	D	193-200
Details of DNase or RNAse treatment	E	193-200
Contamination assessment (DNA or RNA)	E	193-200
Nucleic acid quantification	E	193-200
Instrument and method	E	193-200
Purity (A260/A280)	D	in Table 2
Yield	D	-
RNA integrity method/instrument	E	193-200
RIN/RQI or Cq of 3' and 5' transcripts	E	in Table 1
Electrophoresis traces	D	-
Inhibition testing (Cq dilutions, spike or other)	E	-
REVERSE TRANSCRIPTION
Complete reaction conditions	E	in Table 1
Amount of RNA and reaction volume	E	in Table 1
Priming oligonucleotide (if using GSP) and concentration	E	-
Reverse transcriptase and concentration	E	in Table 1
Temperature and time	E	in Table 1
Manufacturer of reagents and catalogue numbers	D	193-200
Cqs with and without RT	D*	-
Storage conditions of cDNA	D	-
qPCR TARGET INFORMATION		v
If multiplex, efficiency and LOD of each assay.	E	-
Sequence accession number	E	-
Location of amplicon	D	-
Amplicon length	E	-
In silico specificity screen (BLAST, etc)	E	-
Pseudogenes, retropseudogenes or other homologs?	D	-
Sequence alignment	D	-
Secondary structure analysis of amplicon	D	-
Location of each primer by exon or intron (if applicable)	E	-
What splice variants are targeted?	E	-
qPCR OLIGONUCLEOTIDES		v
Primer sequences	E	In Table 1
RTPrimerDB Identification Number	D	-
Probe sequences	D**	-
Location and identity of any modifications	E	-
Manufacturer of oligonucleotides	D	-
Purification method	D	-
qPCR PROTOCOL
Complete reaction conditions	E	193-200
Reaction volume and amount of cDNA/DNA	E	193-200
Primer, (probe), Mg++ and dNTP concentrations	E	193-200
Polymerase identity and concentration	E	193-200
Buffer/kit identity and manufacturer	E	193-200
Exact chemical constitution of the buffer	D	-
Additives (SYBR Green I, DMSO, etc.)	E	193-200
Manufacturer of plates/tubes and catalog number	D	193-200
Complete thermocycling parameters	E	in Table 1
Reaction setup (manual/robotic)	D	193-200
Manufacturer of qPCR instrument	E	193-200
qPCR VALIDATION
Evidence of optimisation (from gradients)	D	-
Specificity (gel, sequence, melt, or digest)	E	-
For SYBR Green I, Cq of the NTC	E	-
Standard curves with slope and y-intercept	E	-
PCR efficiency calculated from slope	E	-
Confidence interval for PCR efficiency or standard error	D	-
r2 of standard curve	E	-
Linear dynamic range	E	-
Cq variation at lower limit	E	-
Confidence intervals throughout range	D	-
Evidence for limit of detection	E	-
If multiplex, efficiency and LOD of each assay.	E	-
DATA ANALYSIS
qPCR analysis program (source, version)	E	-
Cq method determination	E	-
Outlier identification and disposition	E	-
Results of NTCs	E	-
Justification of number and choice of reference genes	E	-
Description of normalisation method	E	-
Number and concordance of biological replicates	D	-
Number and stage (RT or qPCR) of technical replicates	E	-
Repeatability (intra-assay variation)	E	-
Reproducibility (inter-assay variation, %CV)	D	-
Power analysis	D	-
Statistical methods for result significance	E	-
Software (source, version)	E	-
Cq or raw data submission using RDML	D	-
Table 1. MIQE checklist for authors, reviewers and editors. All essential information (E) must be submitted with the manuscript. Desirable
information (D) should be submitted if available. If using primers obtained from RTPrimerDB, information on qPCR target, oligonucleotides,
protocols and validation is available from that source.
*: Assessing the absence of DNA using a no RT assay is essential when first extracting RNA. Once the sample has been validated as
RDNA-free, inclusion of a no-RT control is desirable, but no longer essential.
**: Disclosure of the probe sequence is highly desirable and strongly encouraged. However, since not all commercial pre-designed assay
vendors provide this information, it cannot be an essential requirement. Use of such assays is advised against.
